# Supplementary material for: The MUTYH base excision repair gene protects against inflammation-associated colorectal carcinogenesis
Source: PubMed Central journal article supplement (PMC4637313; doi:10.18632/oncotarget.4284), 2015-06-18
Supplement: oncotarget-06-19671-s001.pdf [file oncotarget-06-19671-s001.pdf]

## SUPPLEMENTARY FIGURES

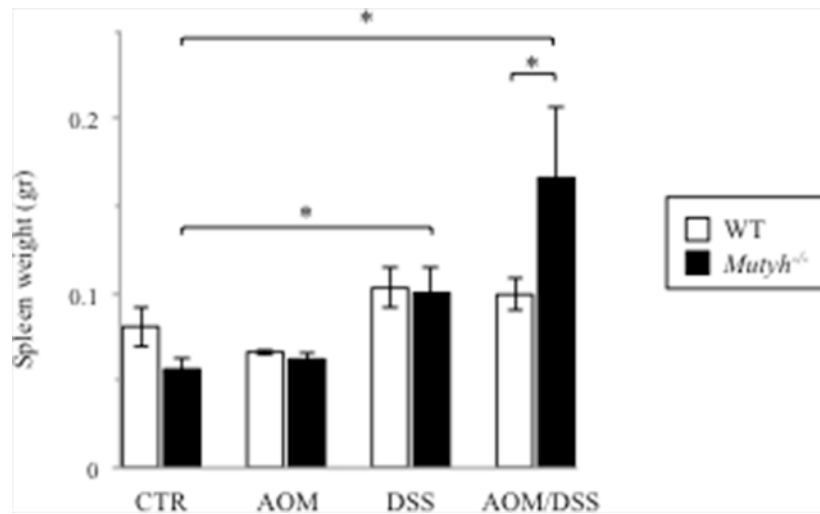

**Supplementary Figure S1: Spleen weights following single and combined AOM and DSS exposures.** Spleen weights were measured at the end of the treatment (80 days) in untreated (control, CTR) or AOM-, DSS- or AOM/DSS-treated mice. Wild-type (open bar) and *Mutyh*<sup>-/-</sup> (full bar) mice. Data are mean ± SE of 5–10 animals/genotype. \* $p \leq 0.05$  (Student's *t*-test)

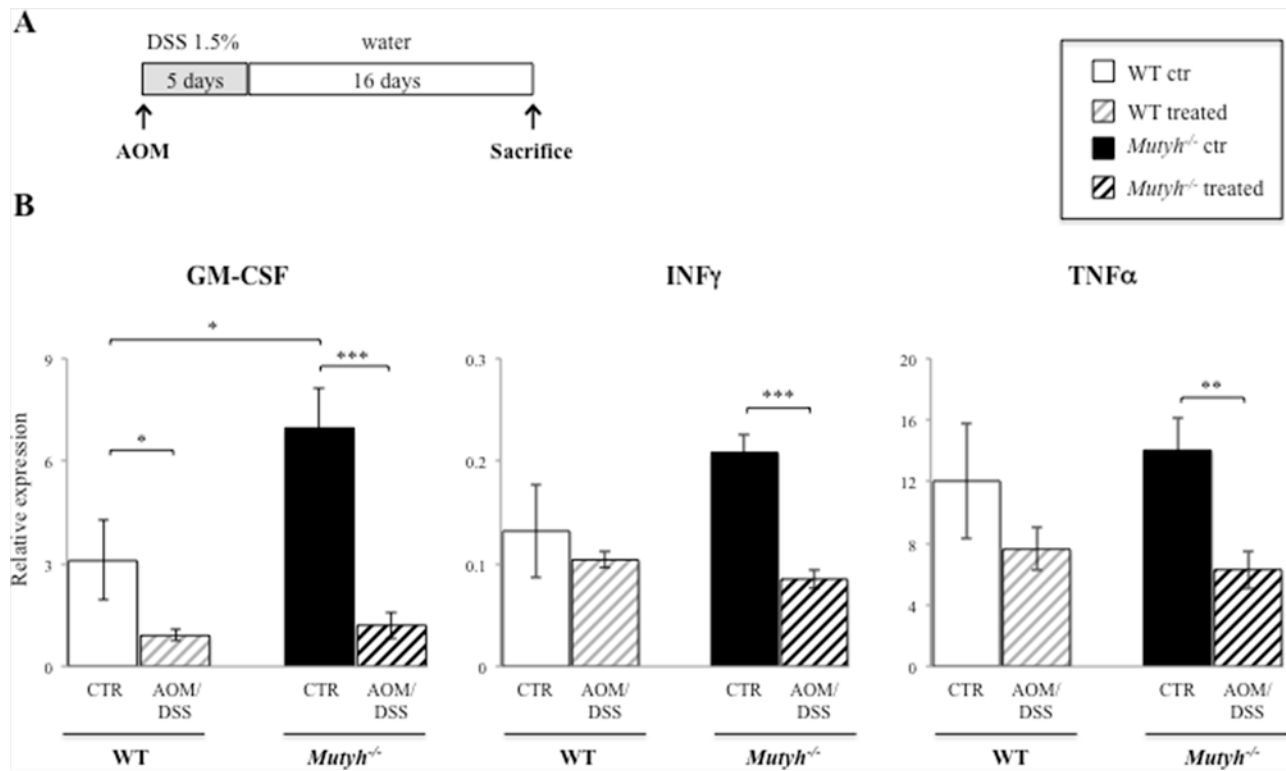

**Supplementary Figure S2: Analysis of cytokines expression in the colon.** A. Schematic representation of the treatment. B. Cytokines levels in the colon of untreated and treated wide-type mice (open and grey dashed bar, respectively) and untreated and treated *Mutyh*<sup>-/-</sup> mice (full and black dashed bar) were measured by the Bio-Plex Pro™ Mouse Cytokine 8-plex Assay. Proteins levels are expressed as concentration (pg/ml)/mg of total proteins. Data are mean  $\pm$  SE of 4–5 animals/genotype. \* $p \leq 0.05$  (Student's *t*-test).
